# Supplementary material for: Cortical network mechanisms of anodal and cathodal transcranial direct current stimulation in awake primates
Source: bioRxiv or medRxiv preprint supplement (doi:10.1101/516260), 2019-07-08

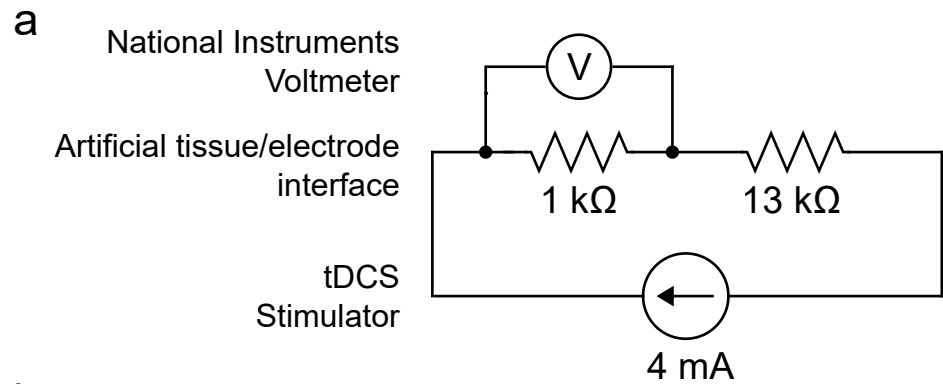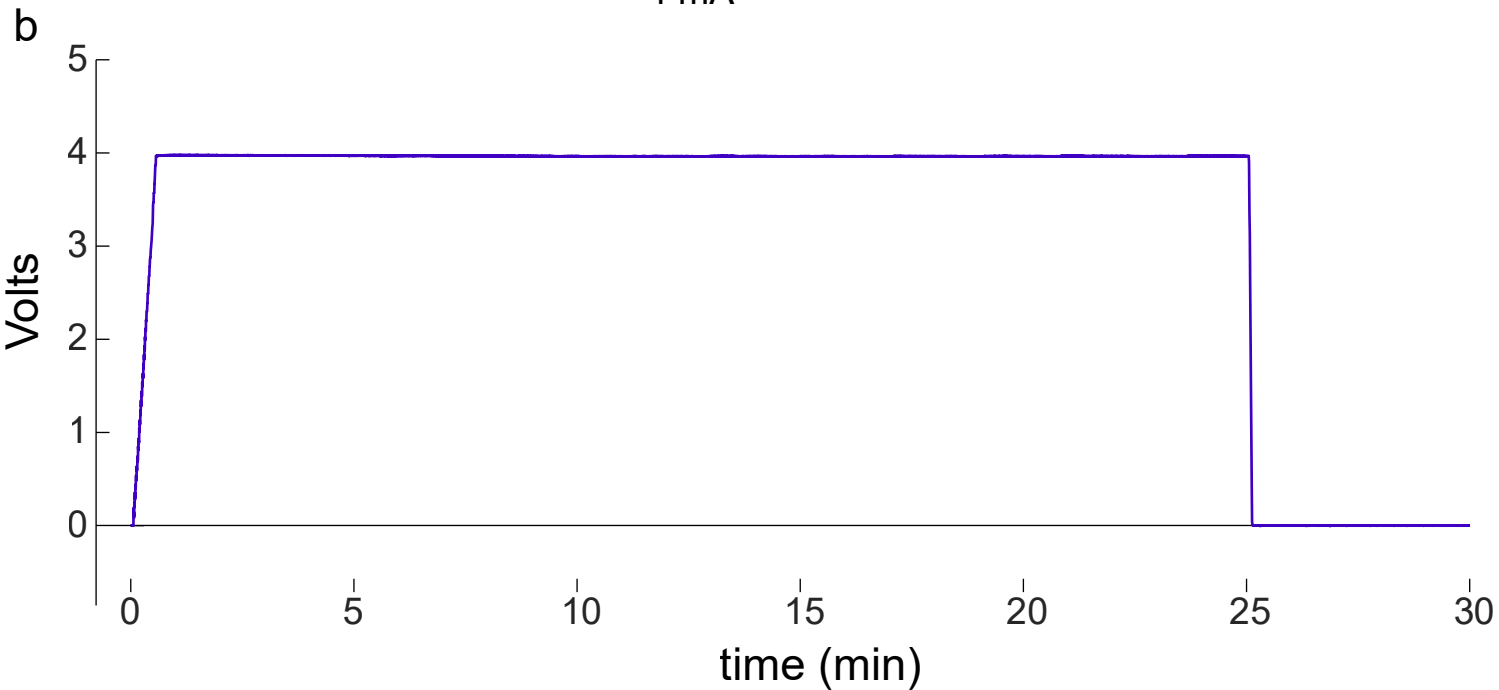

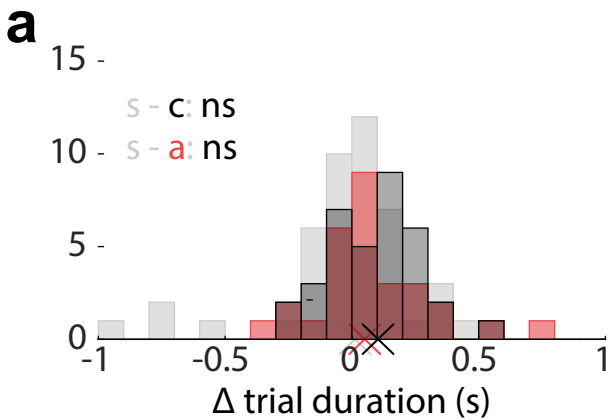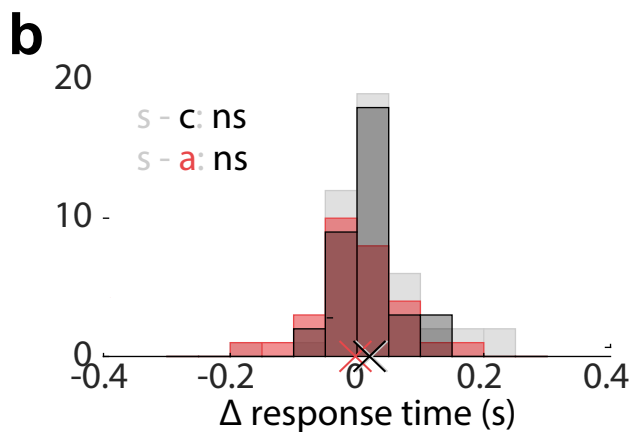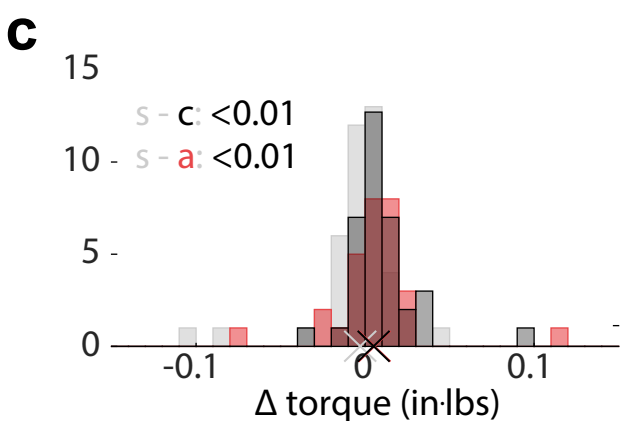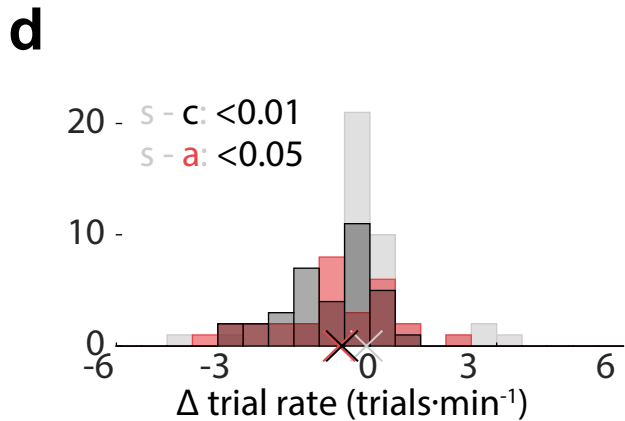

### MONKEY S

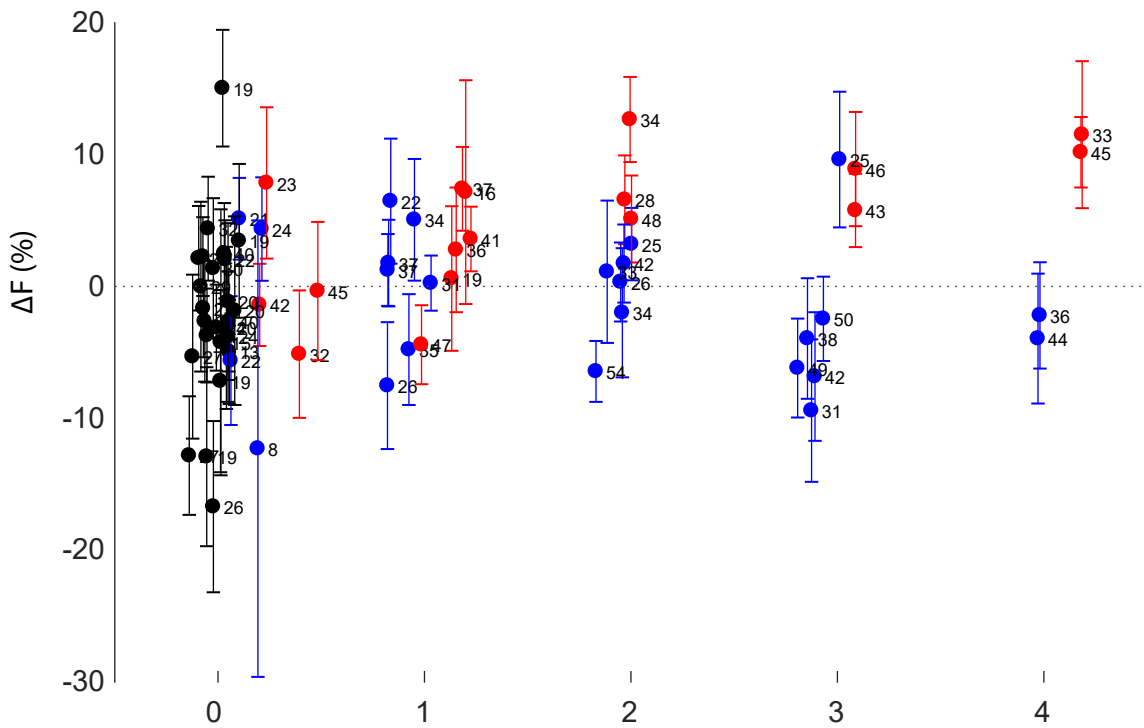

### MONKEY W

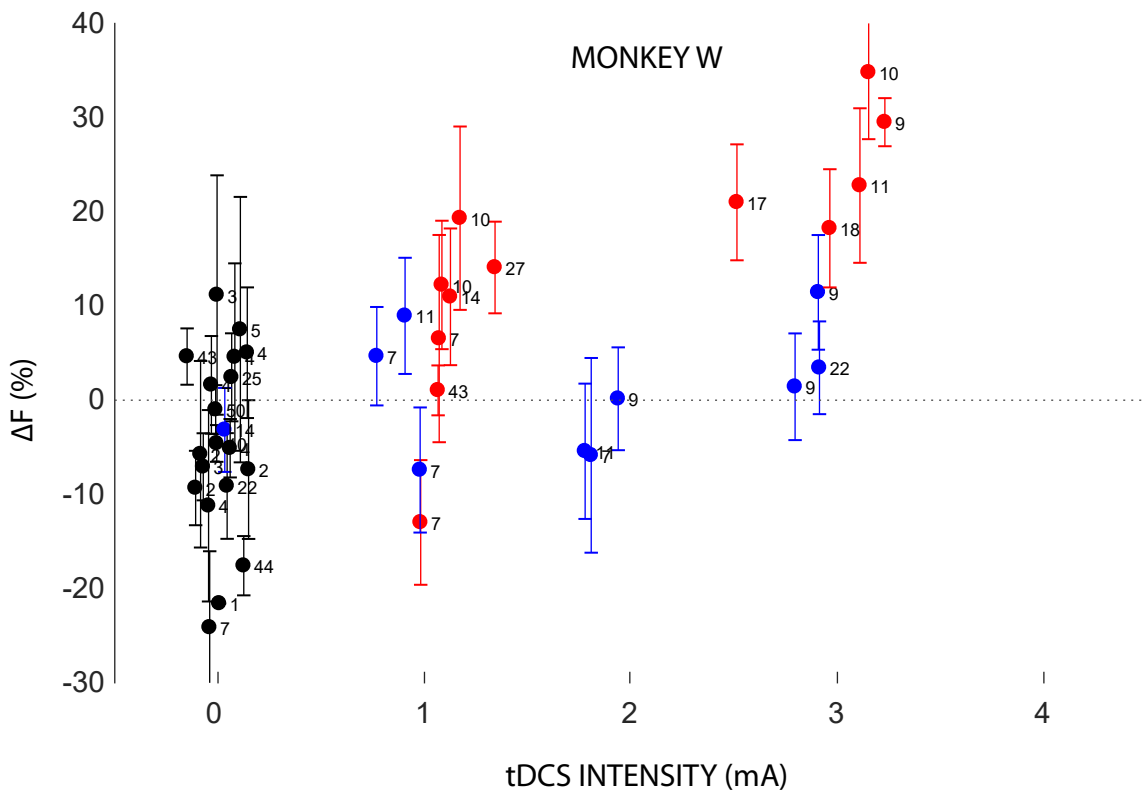

Monkey S

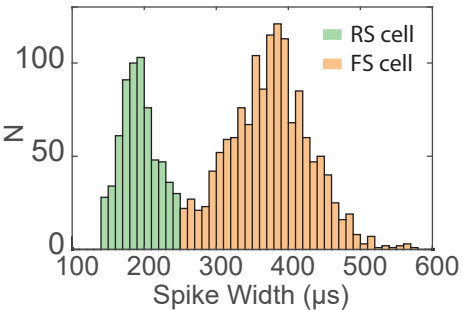

Monkey W

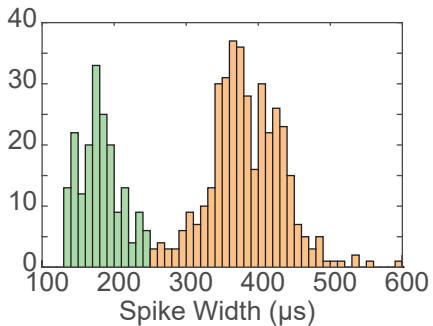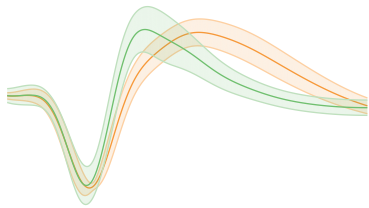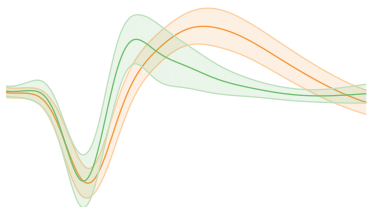

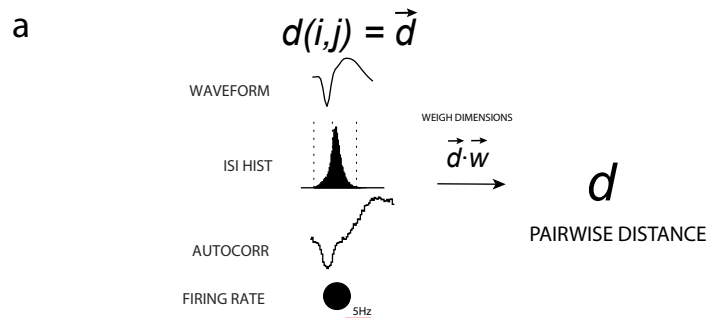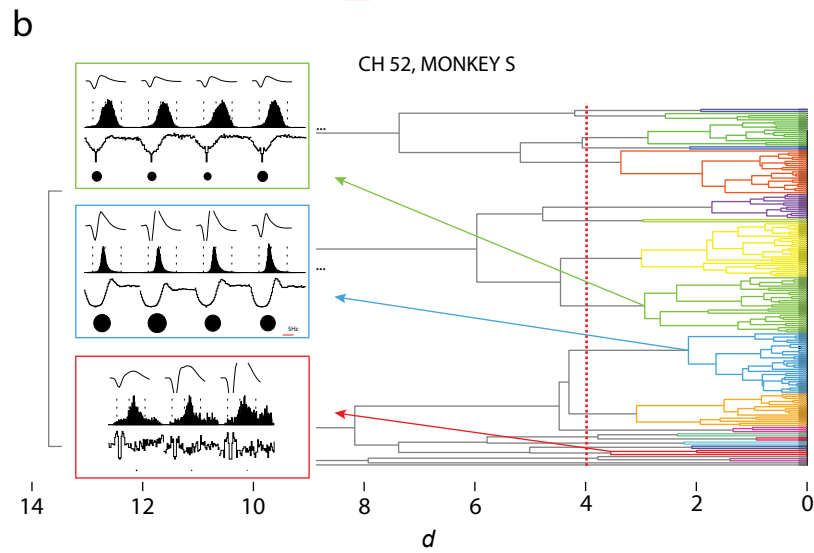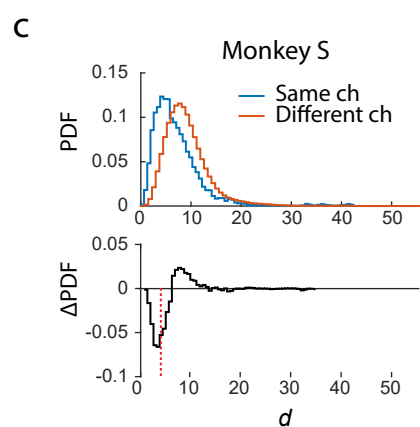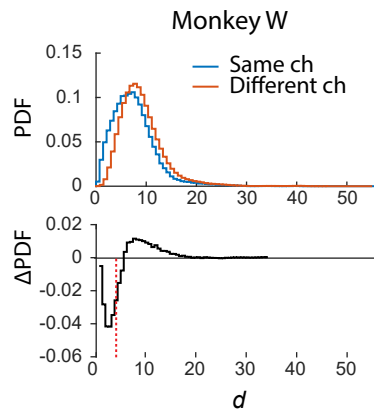

SHAM

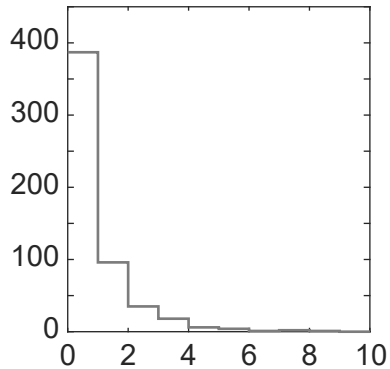

a-tDCS

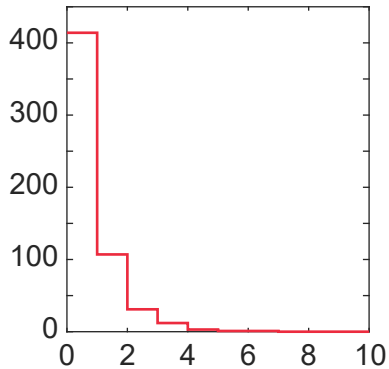

c-tDCS

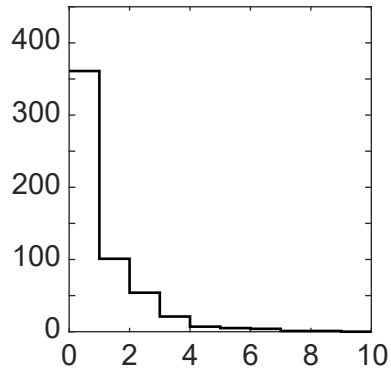

DAYS RECORDED

# CH: S62

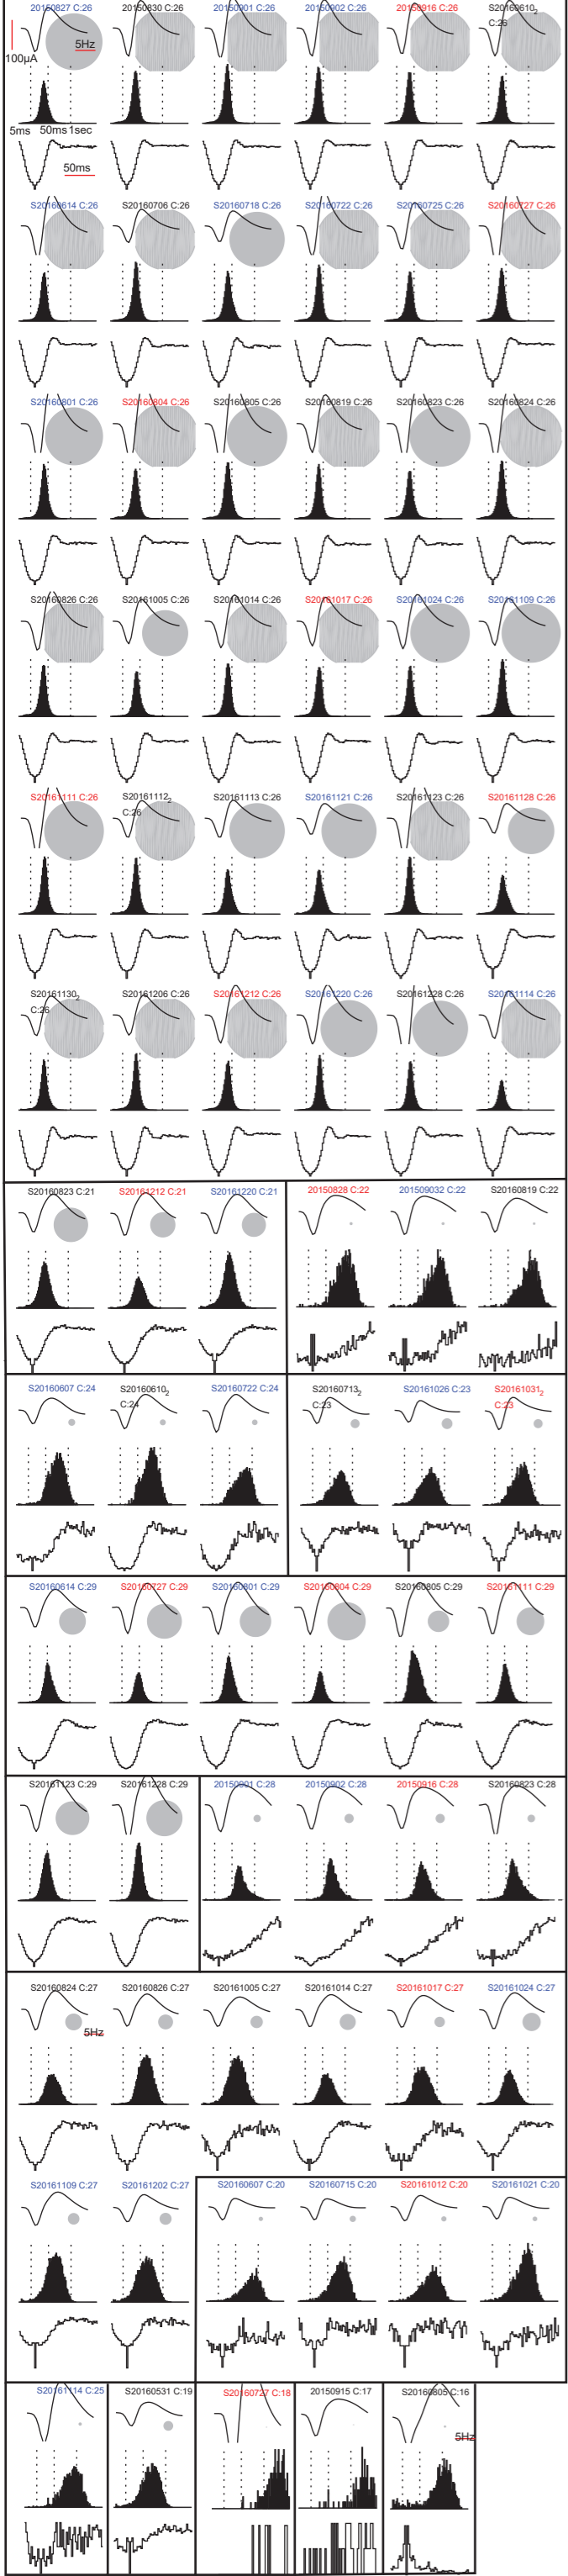

# CH: S81

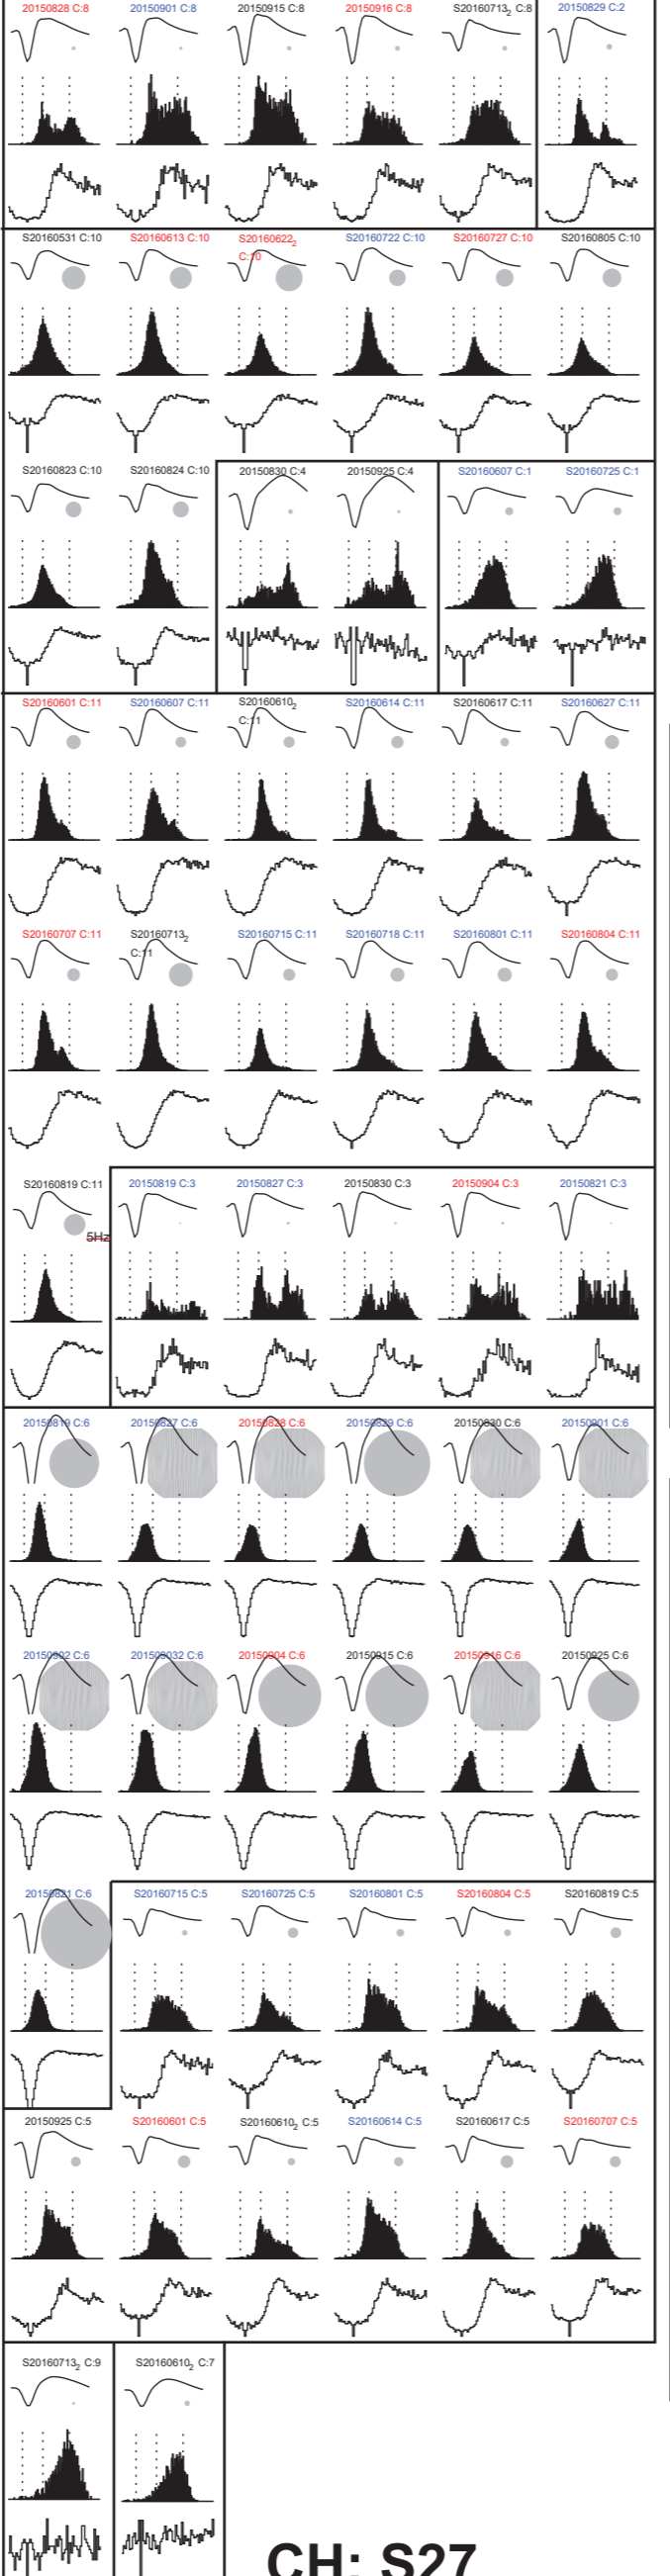

# CH: W13

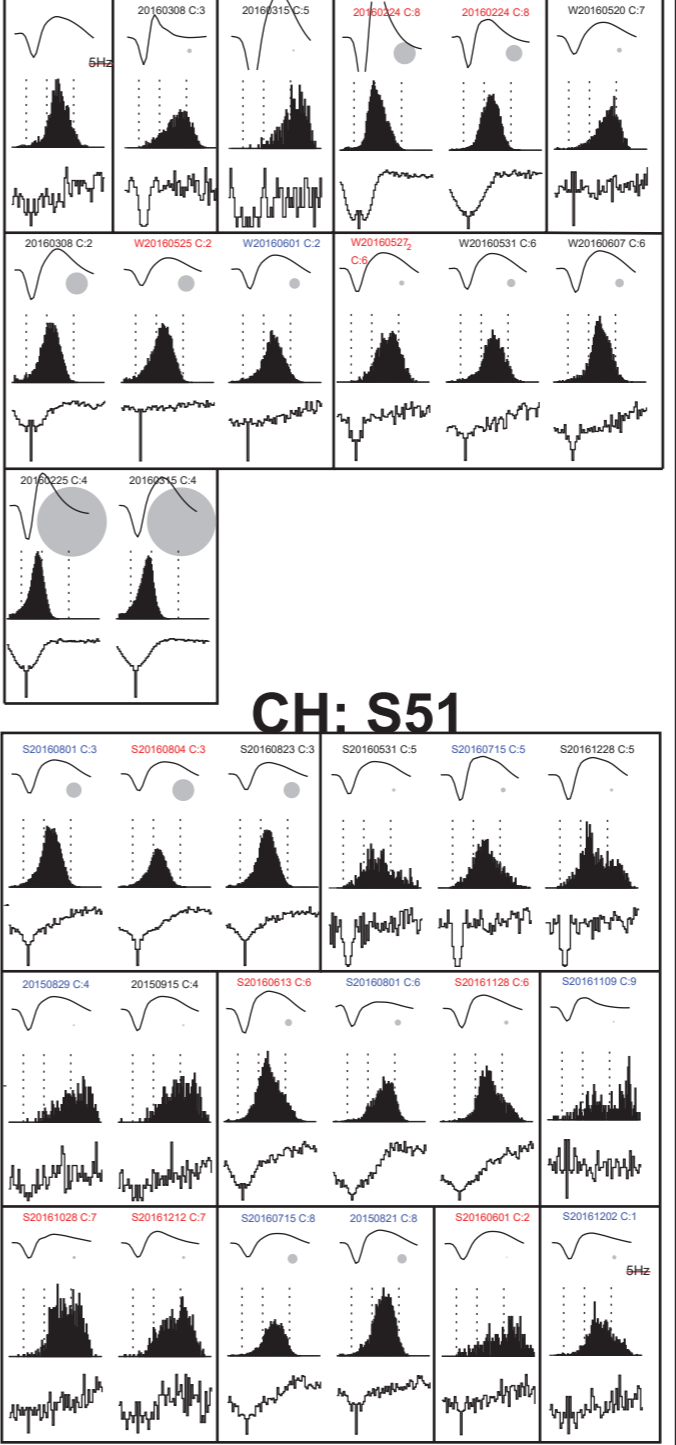

# CH: S51

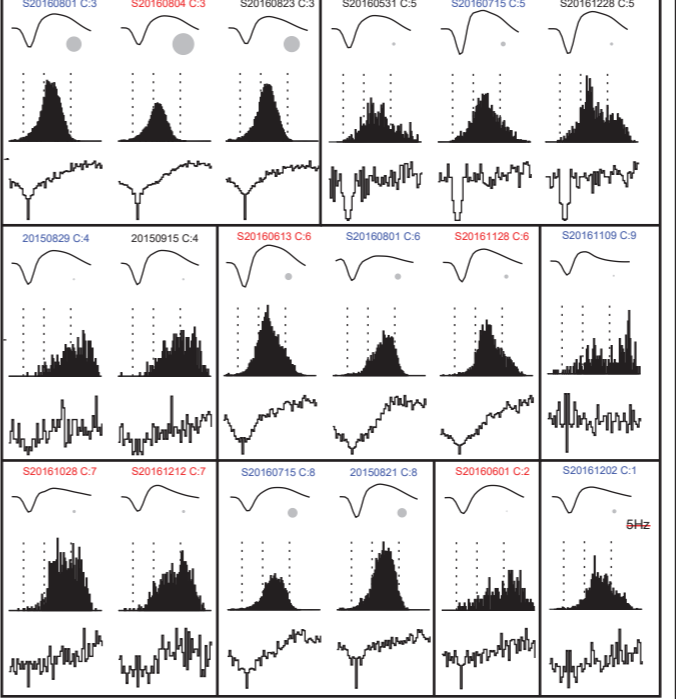

# CH: S90

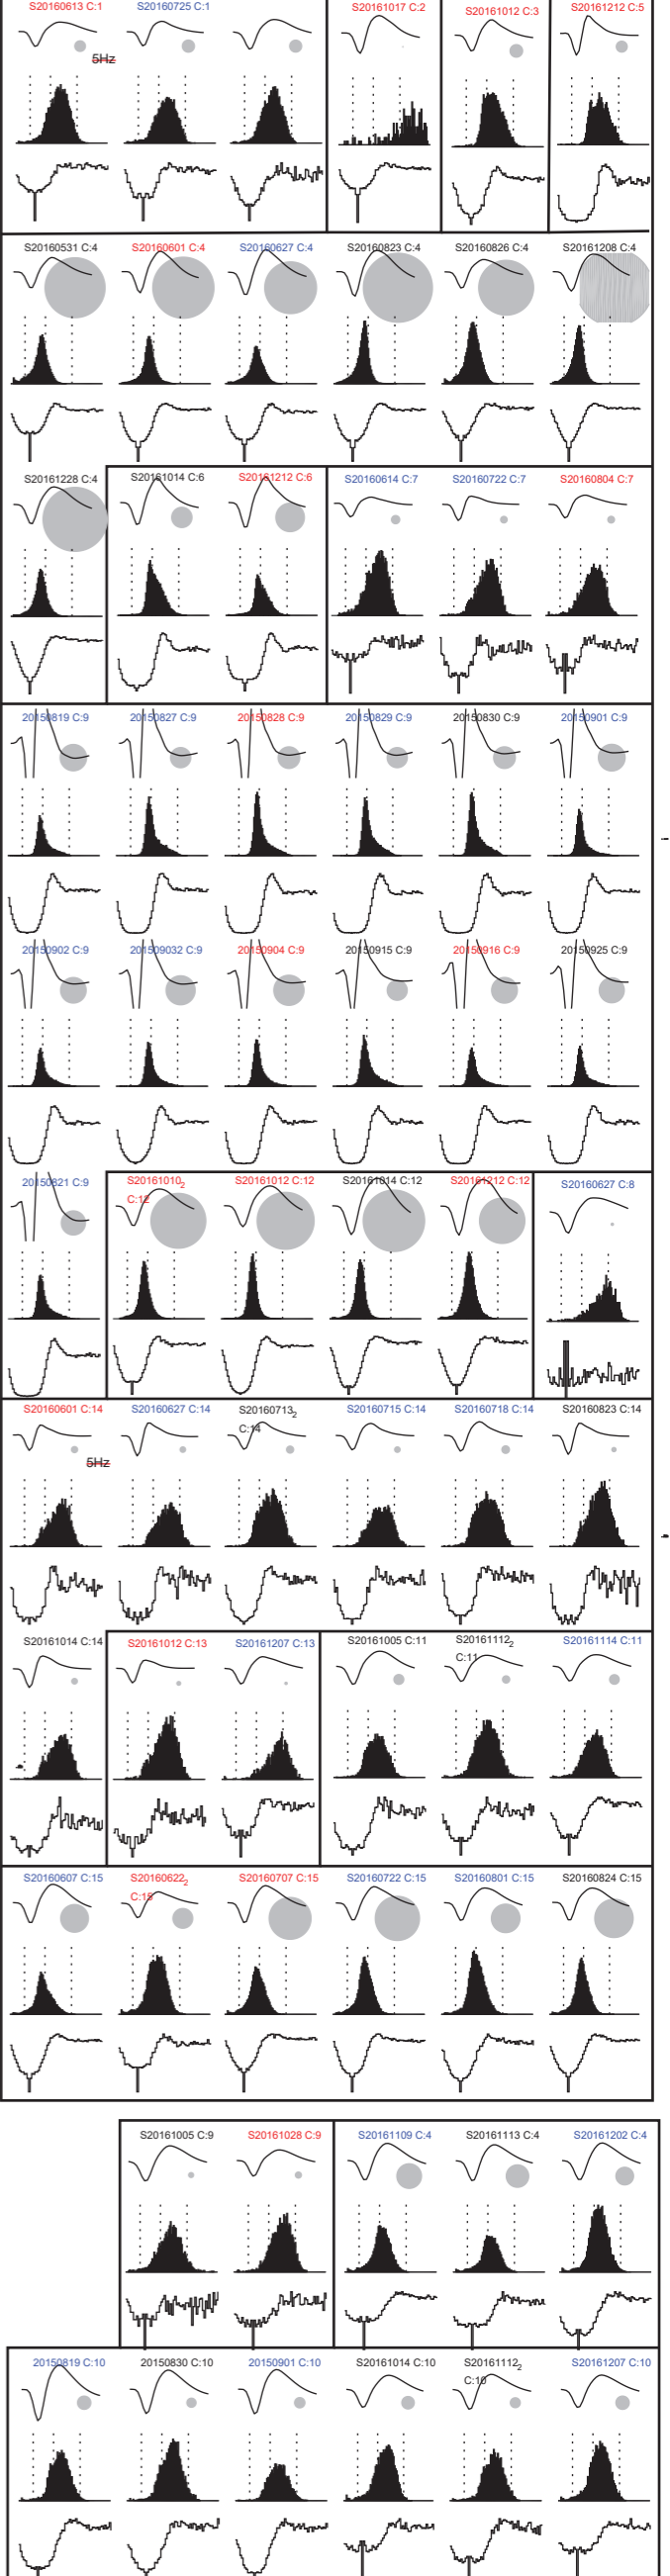

# CH: S18

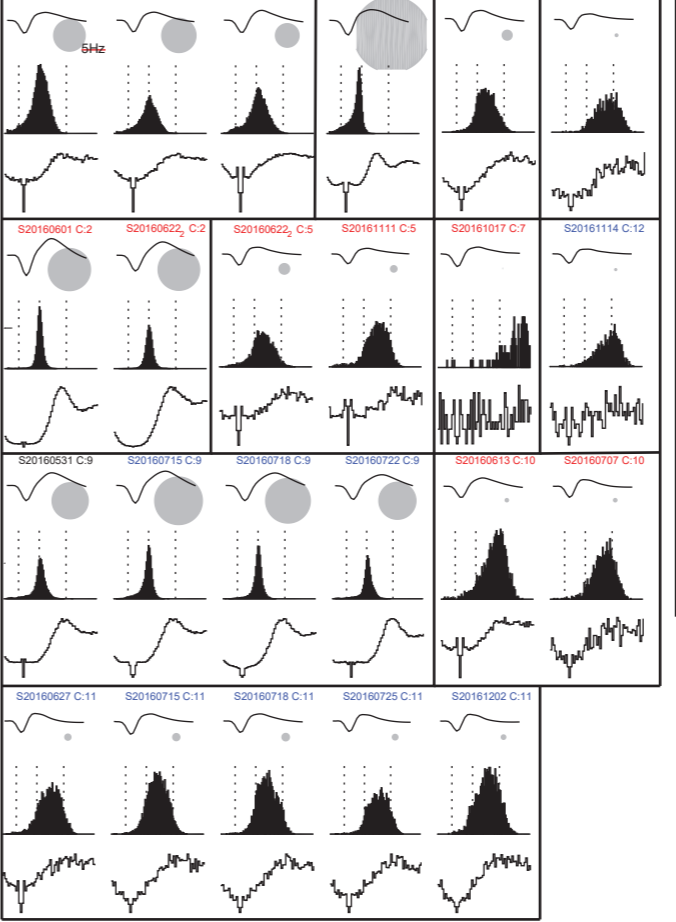

# CH: S27

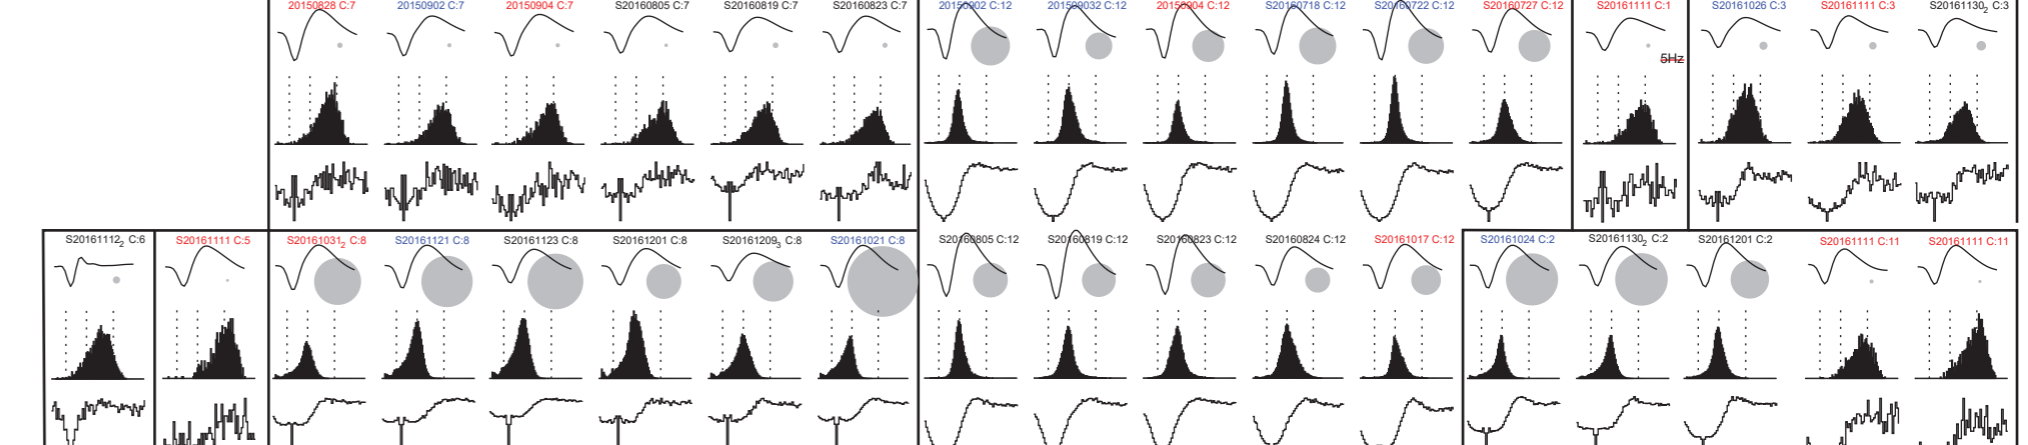

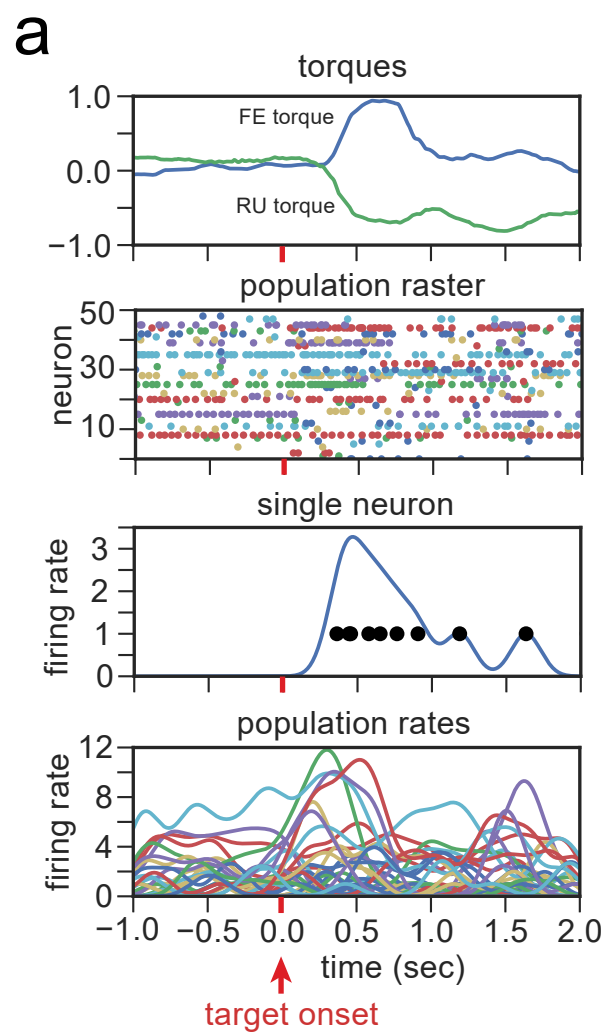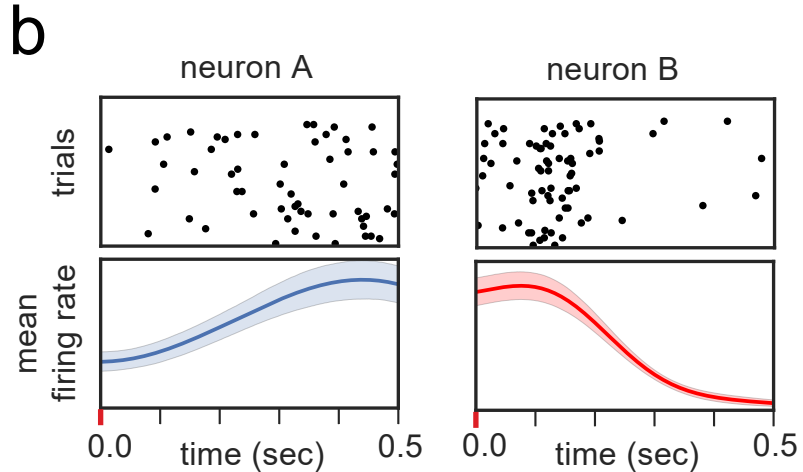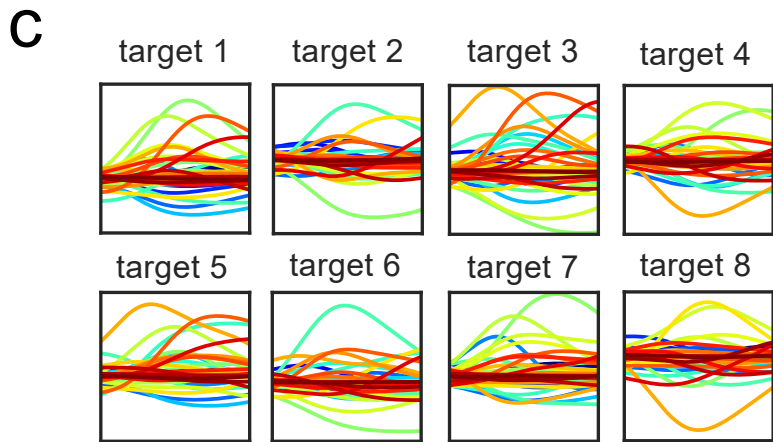



**a**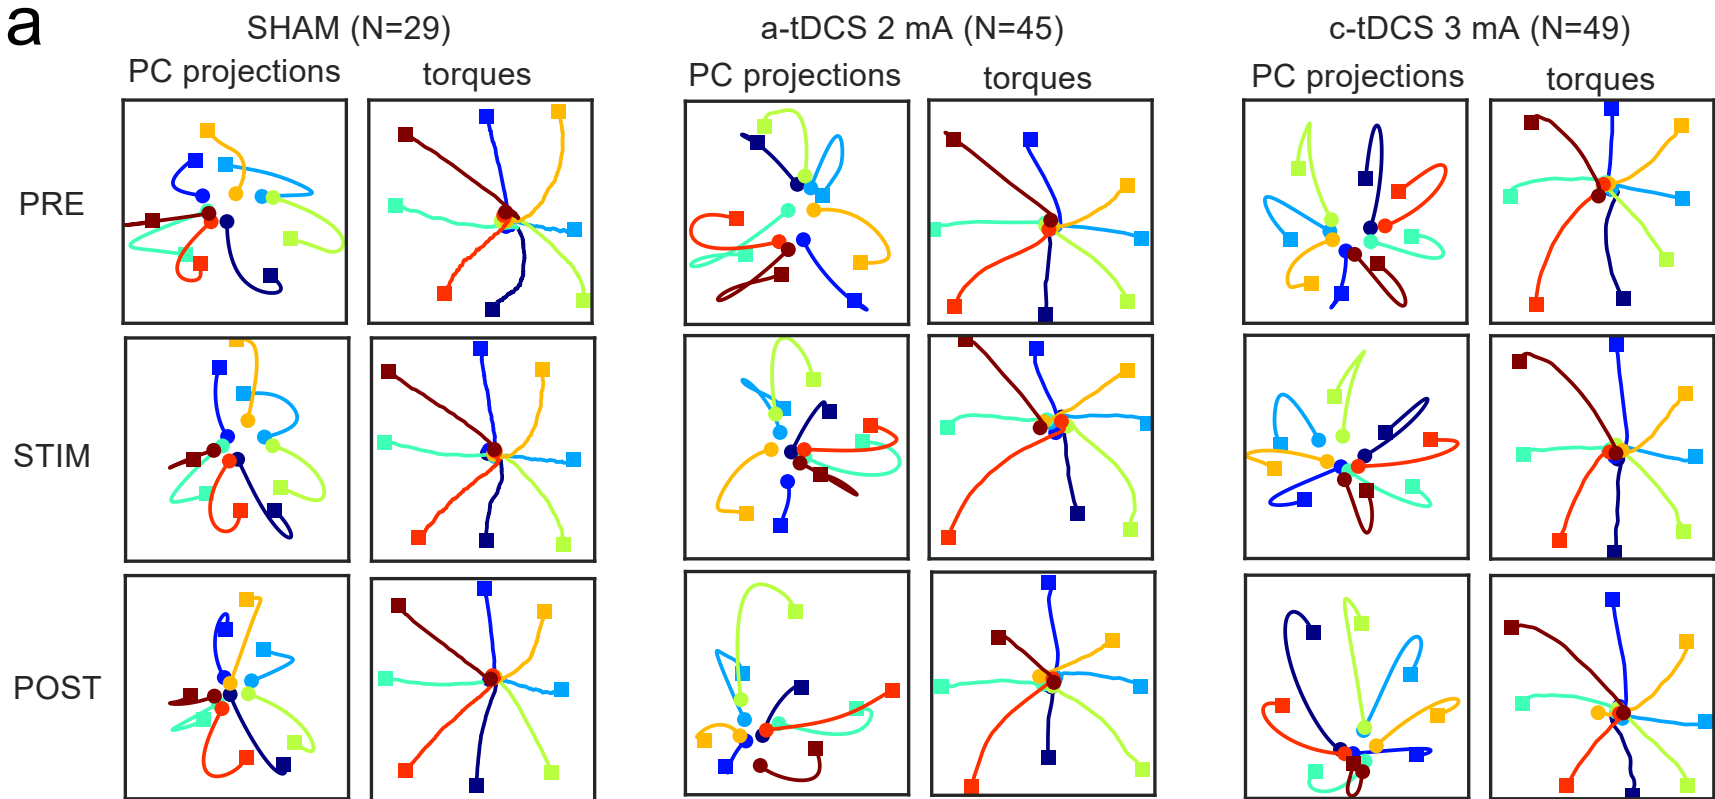**b**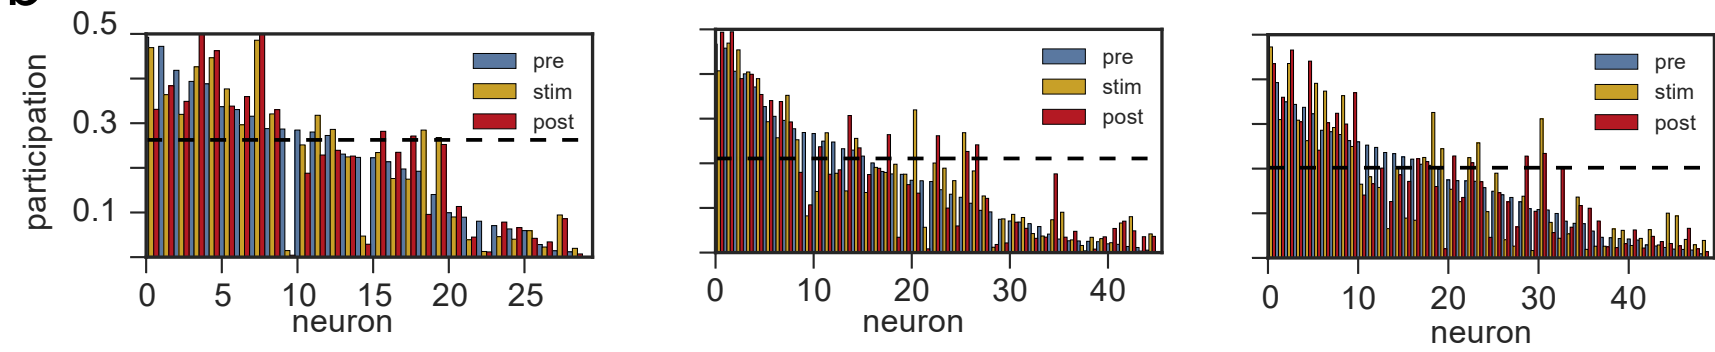

sham anodal cathodal

**a**

PRE vs STIM

PRE vs POST

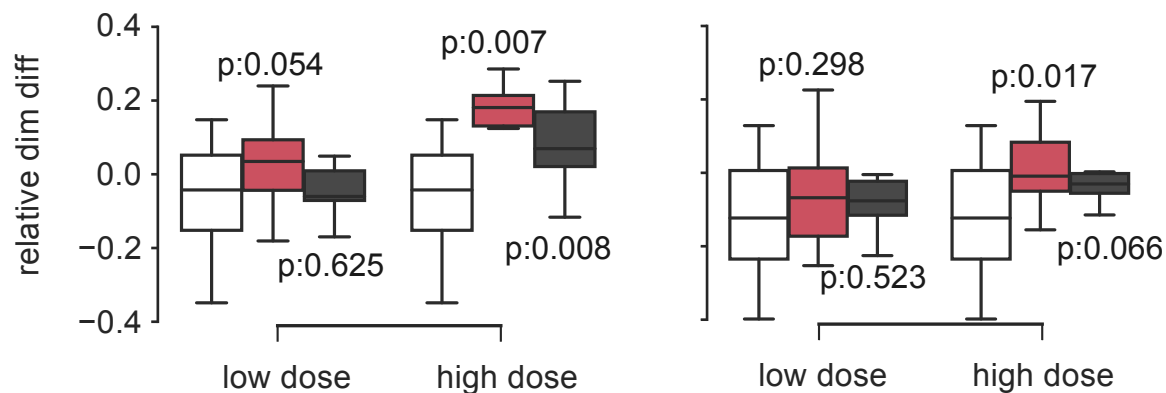

**b**

participation corr

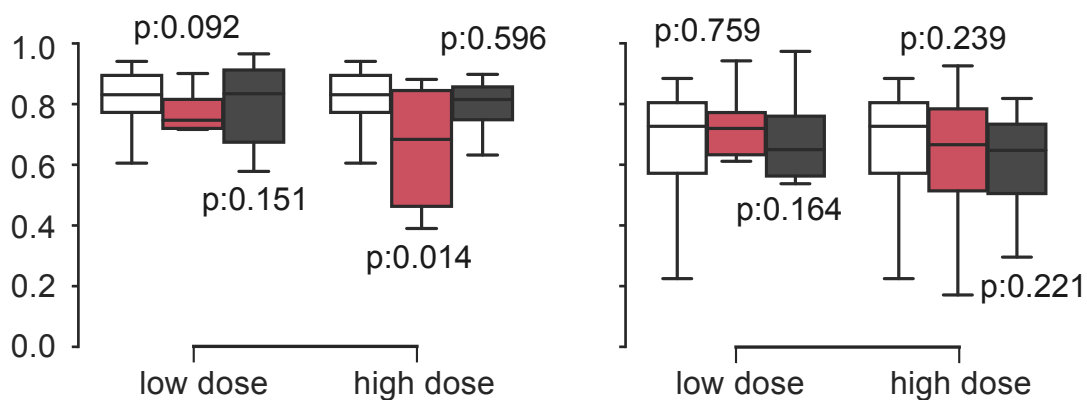

**c**

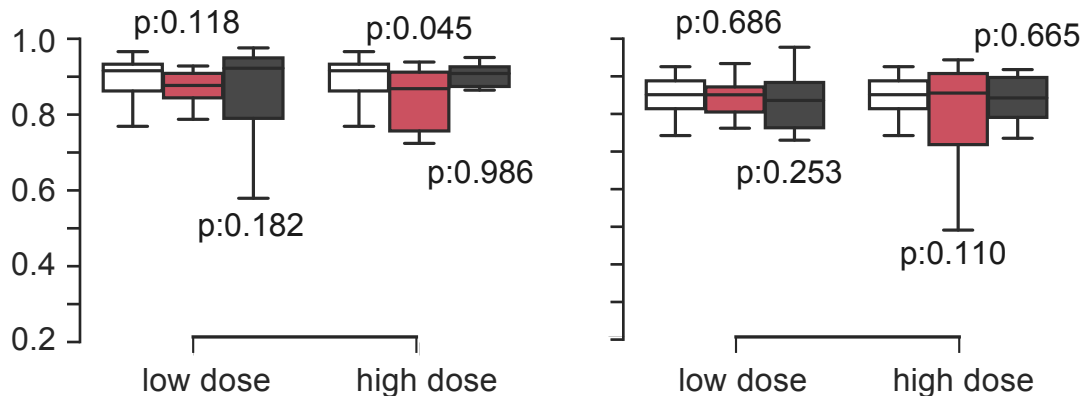

Supplement: Supplementary file [file media-2.pdf]
